# Supplementary material for: Trash to treasure: lactate and protein lactylation in maize root impacts response to drought
Source: Springer Nature journal article supplement (doi:10.1007/s11427-023-2361-1), 2023-05-31
Supplement: 11427_2023_2361_MOESM1_ESM.pdf [file 11427_2023_2361_MOESM1_ESM.pdf]

## Supplementary Figure S1

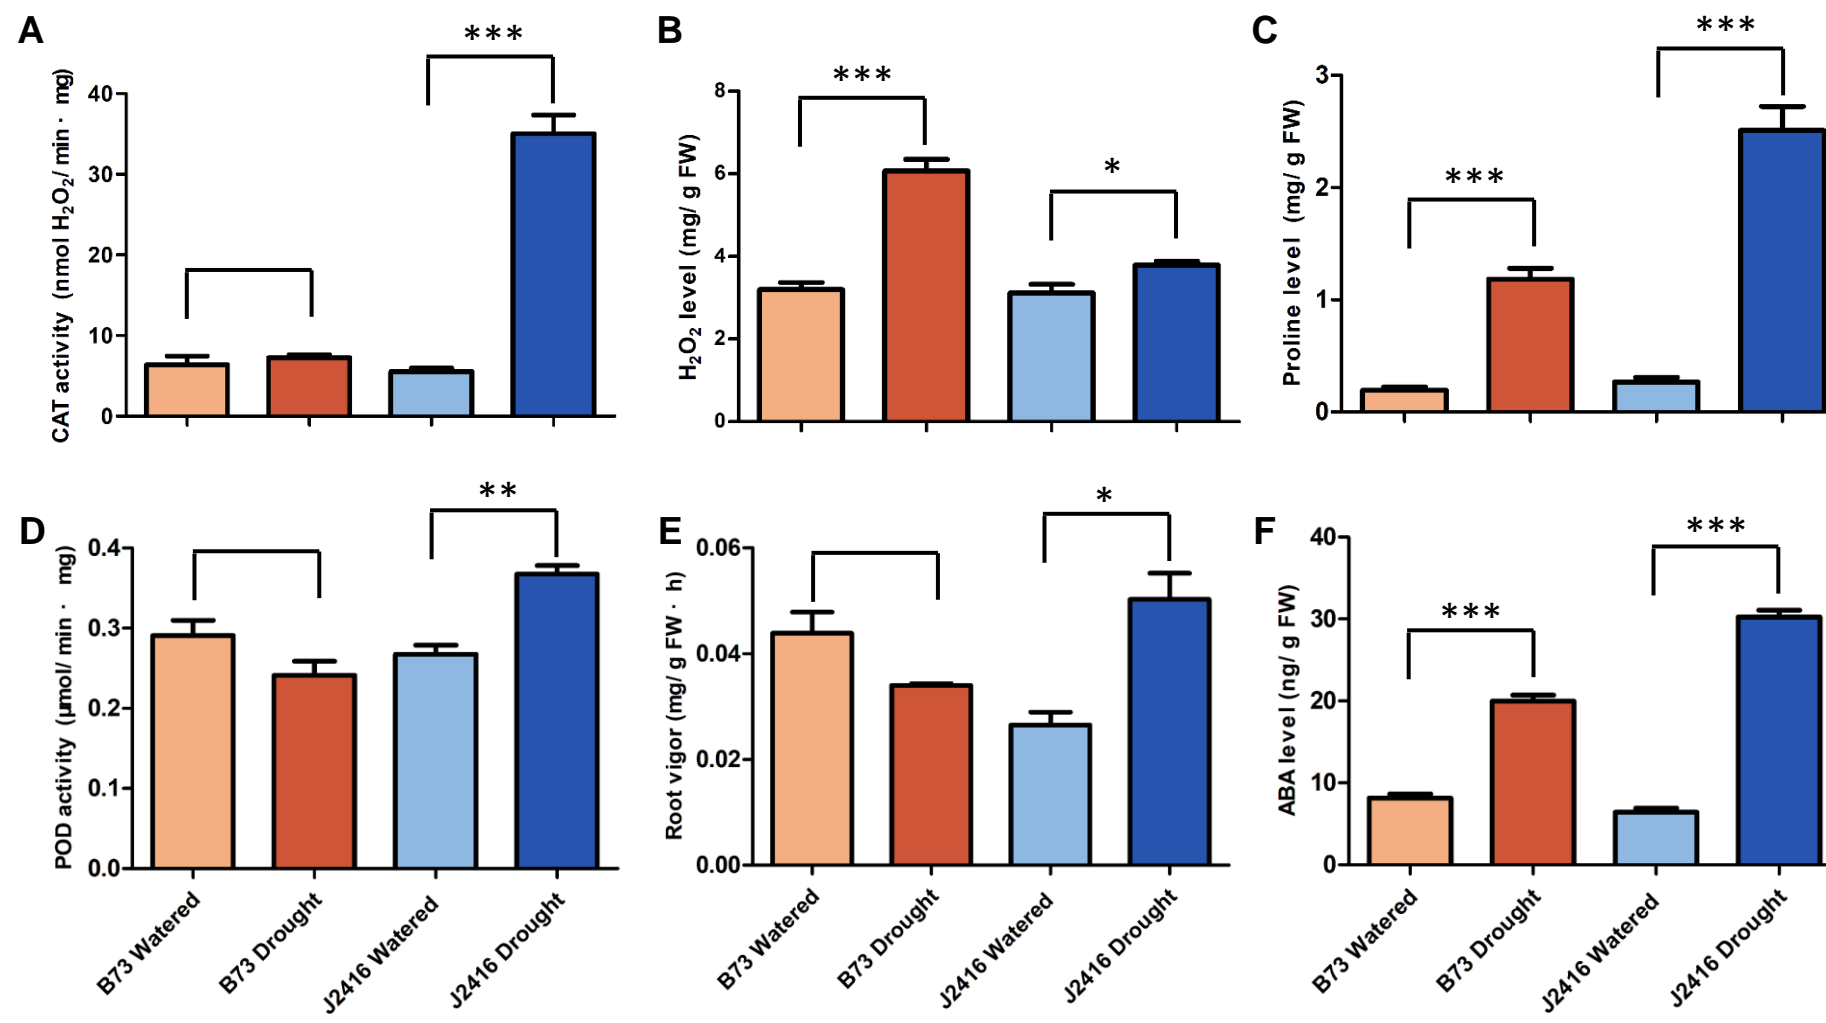

**Figure S1.** Physiological parameters determined before and after drought treatment in two maize lines.

# Supplementary Figure S2

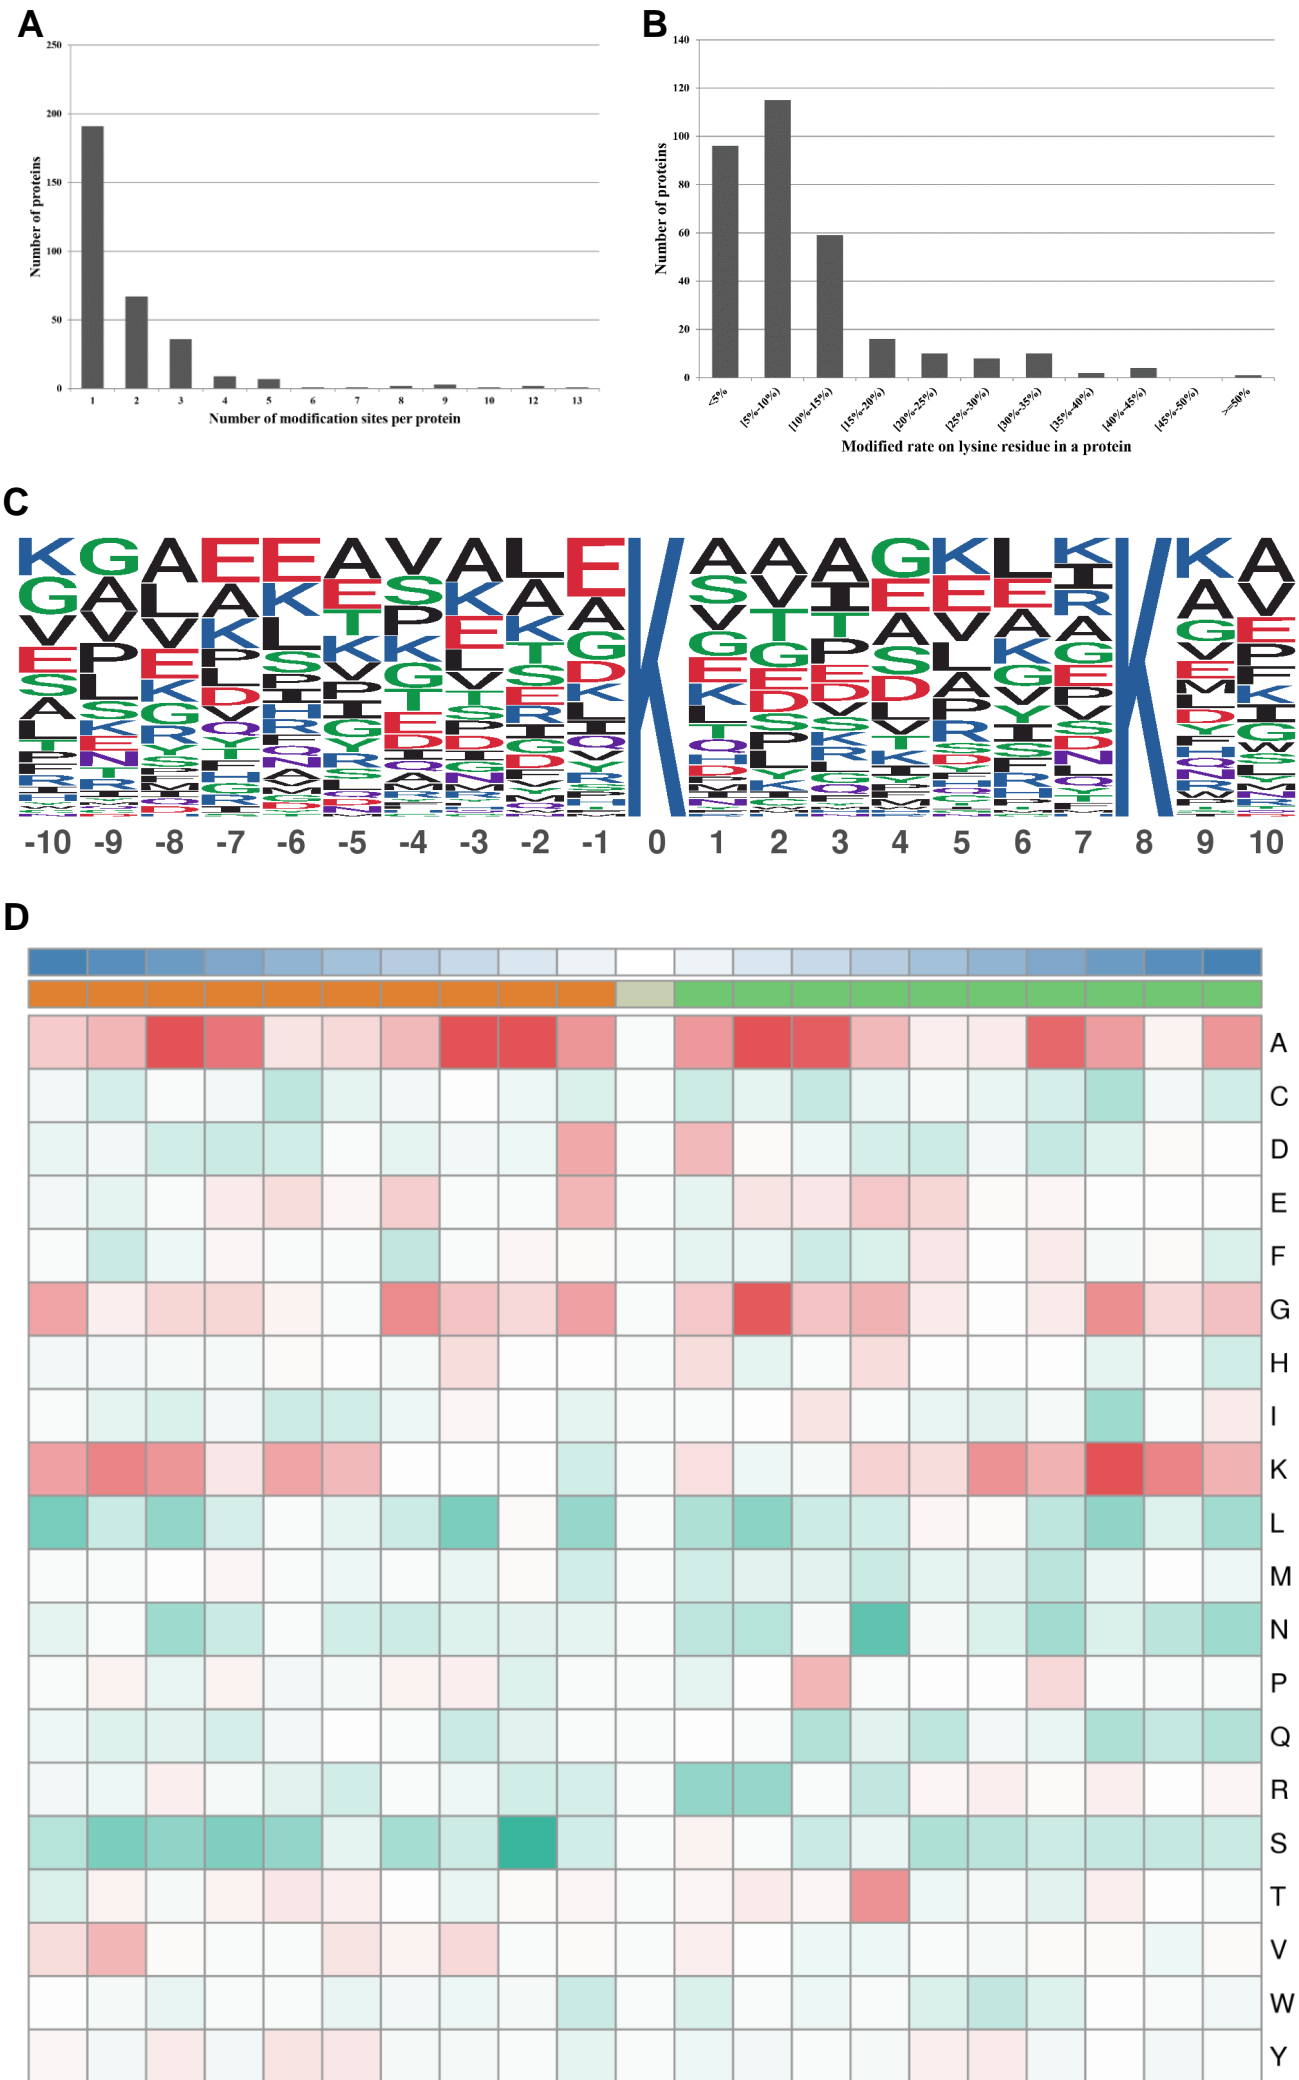

**Figure S2.** Characteristics of K<sub>la</sub> modified proteins and sites in maize roots.

## Supplementary Figure S3

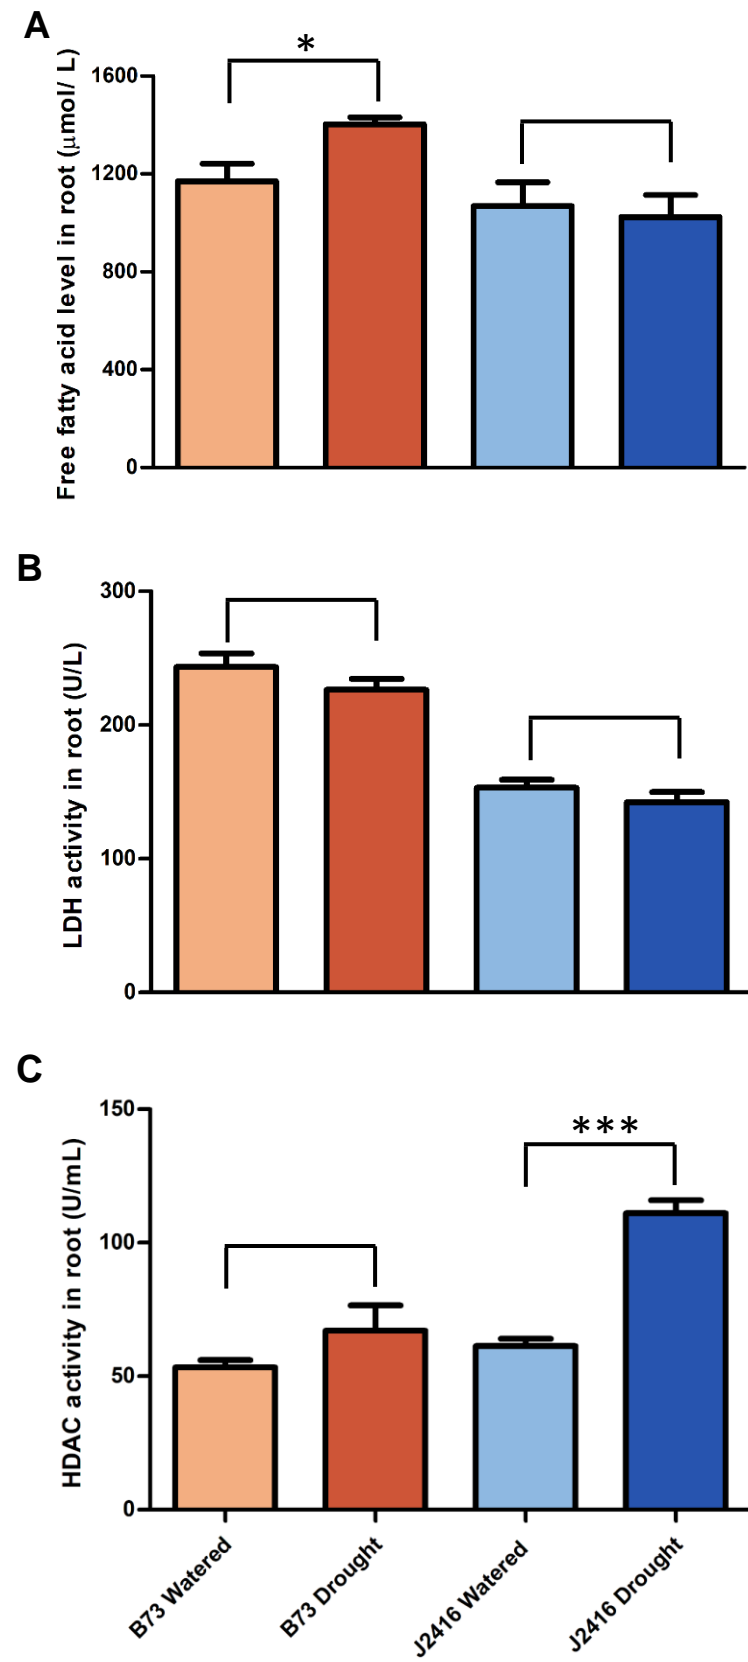

**Figure S3.** The level of fatty acids, LDH, and HDAC activity in maize roots during drought stress.

## Supplementary Figure S4

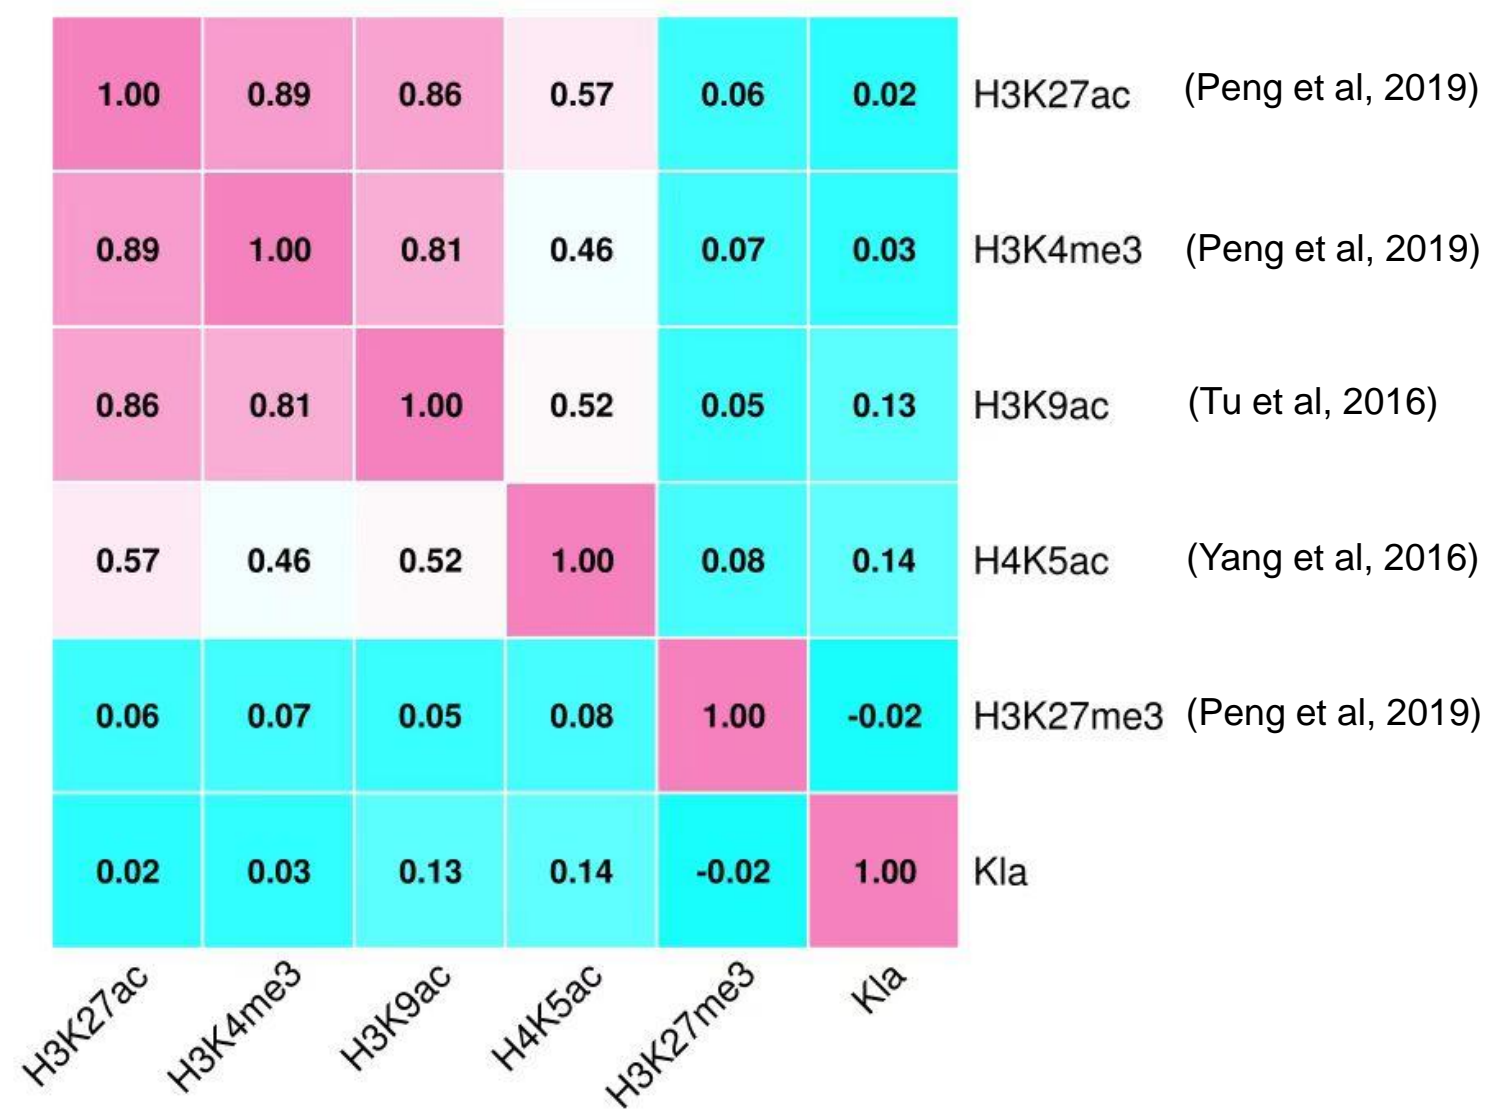

**Figure S4.** The correlogram of Kla and other histone modifications.

# Supplementary Figure S5

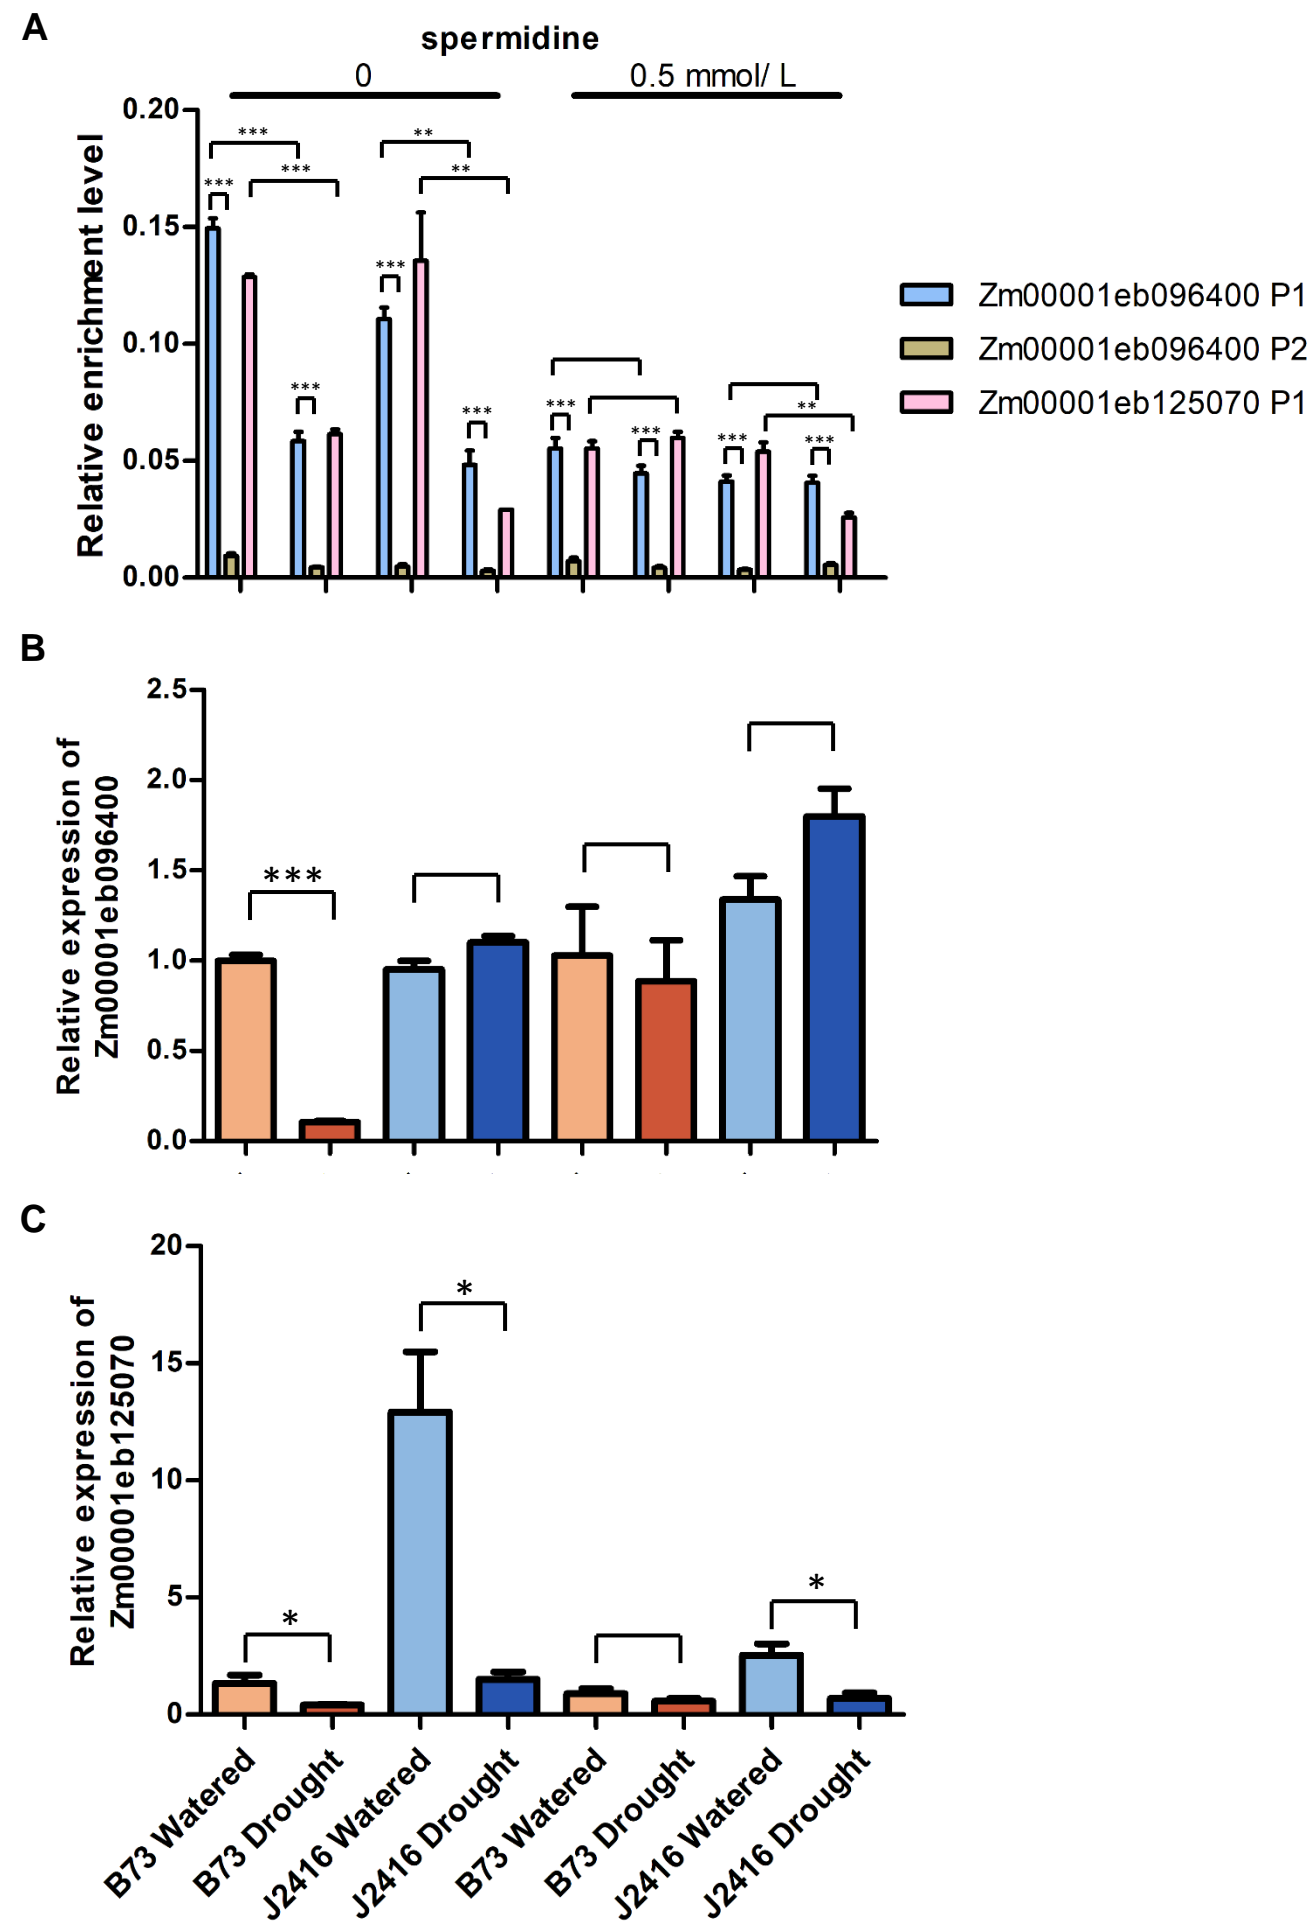

**Figure S5.** ChIP-qPCR and qPCR validation of Zm00001eb096400 and Zm00001eb125070 in spermidine treated B73 and J2416.

## Supplement Figure 6

**A**

| Name          | La (K)                                                                                                                                                                                                                                                                                                                                                                                                                                                                              |            |             |            |             |      |   |  |  |  |  |
|---------------|-------------------------------------------------------------------------------------------------------------------------------------------------------------------------------------------------------------------------------------------------------------------------------------------------------------------------------------------------------------------------------------------------------------------------------------------------------------------------------------|------------|-------------|------------|-------------|------|---|--|--|--|--|
| Description   | Lactylation                                                                                                                                                                                                                                                                                                                                                                                                                                                                         |            |             |            |             |      |   |  |  |  |  |
| Composition   | H(4) O(2) C(3) <span>Change</span> 72.0211293726                                                                                                                                                                                                                                                                                                                                                                                                                                    |            |             |            |             |      |   |  |  |  |  |
| Position      | Not C-term                                                                                                                                                                                                                                                                                                                                                                                                                                                                          |            |             |            |             |      |   |  |  |  |  |
| Type          | Standard                                                                                                                                                                                                                                                                                                                                                                                                                                                                            |            |             |            |             |      |   |  |  |  |  |
| New terminus  | None                                                                                                                                                                                                                                                                                                                                                                                                                                                                                |            |             |            |             |      |   |  |  |  |  |
| Specificities | <div style="display: flex; align-items: center;"> <span>+</span> <span>-</span> Neutral losses <span>+</span> <span>-</span> C <span>↑</span> <span>↓</span> N S E         </div> <table border="1" style="margin-top: 5px;"> <thead> <tr> <th>AA</th> <th>Name</th> <th>Short name</th> <th>Composition</th> <th>Mass</th> </tr> </thead> <tbody> <tr> <td style="background-color: #0056b3; color: white;">K</td> <td></td> <td></td> <td></td> <td></td> </tr> </tbody> </table> | AA         | Name        | Short name | Composition | Mass | K |  |  |  |  |
| AA            | Name                                                                                                                                                                                                                                                                                                                                                                                                                                                                                | Short name | Composition | Mass       |             |      |   |  |  |  |  |
| K             |                                                                                                                                                                                                                                                                                                                                                                                                                                                                                     |            |             |            |             |      |   |  |  |  |  |

**B**

| Analysis            | Software/ Methods | Version and website                                                                                                                        |
|---------------------|-------------------|--------------------------------------------------------------------------------------------------------------------------------------------|
| GO                  | eggNOG-mapper     | v2.0 <a href="https://github.com/eggNOGdb/eggNOG-mapper">https://github.com/eggNOGdb/eggNOG-mapper</a>                                     |
|                     | eggNOG            | v5.0 <a href="http://eggNOG5.embl.de/">http://eggNOG5.embl.de/</a>                                                                         |
| Domain              | PfamScan          | v1.6 <a href="https://www.ebi.ac.uk/seqdb/confluence/display/THD/PfamScan">https://www.ebi.ac.uk/seqdb/confluence/display/THD/PfamScan</a> |
|                     | Pfam              | v33.1 <a href="https://pfam.xfam.org/">https://pfam.xfam.org/</a>                                                                          |
| KEGG                | DIAMOND           | v0.9.24 <a href="https://github.com/bbuchfink/diamond/releases">https://github.com/bbuchfink/diamond/releases</a>                          |
|                     | KEGG Mapper       | v2.5 <a href="http://www.kegg.jp/kegg/mapper.html">http://www.kegg.jp/kegg/mapper.html</a>                                                 |
| Subcellular         | Wolf Psort        | v1.0 <a href="https://wolfsort.hgc.jp/">https://wolfsort.hgc.jp/</a>                                                                       |
| COG/KOG             | eggNOG-mapper     | v2.0 <a href="https://github.com/eggNOGdb/eggNOG-mapper">https://github.com/eggNOGdb/eggNOG-mapper</a>                                     |
|                     | eggNOG            | v5.0 <a href="http://eggNOG5.embl.de/">http://eggNOG5.embl.de/</a>                                                                         |
| Enrichment analysis | Python module     | v1.4.1 <a href="https://pypi.org/project/scipy/1.4.1/">https://pypi.org/project/scipy/1.4.1/</a>                                           |
| Motif               | MoMo              | v5.0.2 <a href="https://meme-suite.org/meme/tools/momo">https://meme-suite.org/meme/tools/momo</a>                                         |

**Figure S6.** Parameters and tools used for lactylation definition and protein annotation. **A.**

MaxQuant interface showing parameters for lactylation identification. **B.** Analytical tools used for annotation and enrichment analysis.

**Table S1.** Identified K-La sites and proteins in four samples.

|               | Identified K-La sites | Identified K-La proteins | Total identified proteins |
|---------------|-----------------------|--------------------------|---------------------------|
| B73 Control   | 253                   | 166                      | 6897                      |
| B73 Drought   | 272                   | 171                      | 6728                      |
| J2416 Control | 290                   | 174                      | 6748                      |
| J2416 Drought | 291                   | 164                      | 6387                      |

Table S2. roteins identified in fatty acid degradation pathways by lactylome.

| Protein accession | Position | Protein description                                                                          | Gene name               | Modified sequence        | B73CK1 | B73CK2 | B73CK3 | B73SD1 | B73SD2 | B73SD3 | J2416CK1 | J2416CK2 | J2416CK3 | J2416SD1 | J2416SD2 | J2416SD3 | J2416SD/J<br>2416CK<br>Ratio | J2416SD/J<br>2416CK P<br>value | Subcellular<br>localization | KEGG<br>KO No. | KEGG<br>Gene                                          | KEGG pathway                                                                                                                                                                                                                                                                                                                                                |
|-------------------|----------|----------------------------------------------------------------------------------------------|-------------------------|--------------------------|--------|--------|--------|--------|--------|--------|----------|----------|----------|----------|----------|----------|------------------------------|--------------------------------|-----------------------------|----------------|-------------------------------------------------------|-------------------------------------------------------------------------------------------------------------------------------------------------------------------------------------------------------------------------------------------------------------------------------------------------------------------------------------------------------------|
| A0A1D6N7A4        | 498      | Acyl-coenzyme A oxidase<br>OS=Zea mays<br>OX=4577<br>GN=ZEAMMB73_Zm00001d042884<br>PE=3 SV=1 | ZEAMMB73_Zm00001d042884 | ALYAEFLGAQK(1)K          |        |        |        |        |        |        | 0.756    | 1.052    | 0.928    | 0.289    | 0.854    | 0.354    | 0.547                        | 0.1091353                      | chloroplast                 | K00232         | E1.3.3.6, ACOX1, ACOX3; acyl-CoA oxidase [EC:1.3.3.6] | map00071 Fatty acid degradation; map00410 beta-Alanine metabolism; map00592 alpha-Linolenic acid metabolism; map00640 Propanoate metabolism; map01040 Biosynthesis of unsaturated fatty acids; map01100 Metabolic pathways; map01110 Biosynthesis of secondary metabolites; map01200 Carbon metabolism; map01212 Fatty acid metabolism; map04146 Peroxisome |
| A0A1D6N7A4        | 179      | Acyl-coenzyme A oxidase<br>OS=Zea mays<br>OX=4577<br>GN=ZEAMMB73_Zm00001d042884<br>PE=3 SV=1 | ZEAMMB73_Zm00001d042884 | HHDK(1)WLVATE<br>NYDIK   |        |        |        |        |        |        | 0.654    | 0.645    |          |          |          |          |                              |                                | chloroplast                 | K00232         | E1.3.3.6, ACOX1, ACOX3; acyl-CoA oxidase [EC:1.3.3.6] | map00071 Fatty acid degradation; map00410 beta-Alanine metabolism; map00592 alpha-Linolenic acid metabolism; map00640 Propanoate metabolism; map01040 Biosynthesis of unsaturated fatty acids; map01100 Metabolic pathways; map01110 Biosynthesis of secondary metabolites; map01200 Carbon metabolism; map01212 Fatty acid metabolism; map04146 Peroxisome |
| B4F8X3            | 443      | Acyl-coenzyme A oxidase<br>OS=Zea mays<br>OX=4577<br>GN=100191469<br>PE=2 SV=1               | 100191469               | ILMK(1)T<br>LSQLTSG<br>K | 1.198  | 1.354  | 1.28   |        |        |        |          |          |          |          |          |          |                              |                                | chloroplast                 | K00232         | E1.3.3.6, ACOX1, ACOX3; acyl-CoA oxidase [EC:1.3.3.6] | map00071 Fatty acid degradation; map00410 beta-Alanine metabolism; map00592 alpha-Linolenic acid metabolism; map00640 Propanoate metabolism; map01040 Biosynthesis of unsaturated fatty acids; map01100 Metabolic pathways; map01110 Biosynthesis of secondary metabolites; map01200 Carbon metabolism; map01212 Fatty acid metabolism; map04146 Peroxisome |
| B4F8X3            | 314      | Acyl-coenzyme A oxidase<br>OS=Zea mays<br>OX=4577<br>GN=100191469<br>PE=2 SV=1               | 100191469               | K(1)QFGS<br>QDGGPE<br>TK |        |        |        |        |        |        | 1.087    | 1.177    | 1.151    | 0.386    | 0.256    | 0.268    | 0.266                        | 0.0005321                      | chloroplast                 | K00232         | E1.3.3.6, ACOX1, ACOX3; acyl-CoA oxidase [EC:1.3.3.6] | map00071 Fatty acid degradation; map00410 beta-Alanine metabolism; map00592 alpha-Linolenic acid metabolism; map00640 Propanoate metabolism; map01040 Biosynthesis of unsaturated fatty acids; map01100 Metabolic pathways; map01110 Biosynthesis of secondary metabolites; map01200 Carbon metabolism; map01212 Fatty acid metabolism; map04146 Peroxisome |



|        |     |                                                                                                                    |                                  |                             |      |       |  |  |  |  |      |       |       |       |  |  |  |             |        |                                                                                                                                                                                                                                                                                                                                                                                                                      |
|--------|-----|--------------------------------------------------------------------------------------------------------------------|----------------------------------|-----------------------------|------|-------|--|--|--|--|------|-------|-------|-------|--|--|--|-------------|--------|----------------------------------------------------------------------------------------------------------------------------------------------------------------------------------------------------------------------------------------------------------------------------------------------------------------------------------------------------------------------------------------------------------------------|
| B4F8X3 | 659 | Acyl-coenzyme A oxidase<br>OS=Zea mays<br>OX=4577<br>GN=1001914<br>69 PE=2<br>SV=1                                 | 100191469                        | PLLK(1)Q<br>QLK             |      |       |  |  |  |  | 0.75 | 0.539 | 0.693 |       |  |  |  | chloroplast | K00232 | E1.3.3.6, ACOX1, ACOX3; acyl-CoA oxidase [EC:1.3.3.6]<br>map00071 Fatty acid degradation; map00410 beta-Alanine metabolism; map00592 alpha-Linolenic acid metabolism; map00640 Propanoate metabolism; map01040 Biosynthesis of unsaturated fatty acids; map01100 Metabolic pathways; map01110 Biosynthesis of secondary metabolites; map01200 Carbon metabolism; map01212 Fatty acid metabolism; map04146 Peroxisome |
| B4F8X3 | 663 | Acyl-coenzyme A oxidase<br>OS=Zea mays<br>OX=4577<br>GN=1001914<br>69 PE=2<br>SV=1                                 | 100191469                        | QQLK(1)L<br>SR              | 1.05 | 0.964 |  |  |  |  |      |       |       | 1.428 |  |  |  | chloroplast | K00232 | E1.3.3.6, ACOX1, ACOX3; acyl-CoA oxidase [EC:1.3.3.6]<br>map00071 Fatty acid degradation; map00410 beta-Alanine metabolism; map00592 alpha-Linolenic acid metabolism; map00640 Propanoate metabolism; map01040 Biosynthesis of unsaturated fatty acids; map01100 Metabolic pathways; map01110 Biosynthesis of secondary metabolites; map01200 Carbon metabolism; map01212 Fatty acid metabolism; map04146 Peroxisome |
| B4G0E0 | 309 | Acyl-coenzyme A oxidase 4 peroxisomal<br>OS=Zea mays<br>OX=4577<br>GN=ZEAMM<br>B73_Zm0000<br>1d037521<br>PE=2 SV=1 | ZEAMMB<br>73_Zm0000<br>01d037521 | K(1)QFGA<br>PLAAFQL<br>NQEK |      |       |  |  |  |  | 0.72 | 0.863 | 0.85  |       |  |  |  | chloroplast | K00232 | E1.3.3.6, ACOX1, ACOX3; acyl-CoA oxidase [EC:1.3.3.6]<br>map00071 Fatty acid degradation; map00410 beta-Alanine metabolism; map00592 alpha-Linolenic acid metabolism; map00640 Propanoate metabolism; map01040 Biosynthesis of unsaturated fatty acids; map01100 Metabolic pathways; map01110 Biosynthesis of secondary metabolites; map01200 Carbon metabolism; map01212 Fatty acid metabolism; map04146 Peroxisome |
| B4G0E0 | 350 | Acyl-coenzyme A oxidase 4 peroxisomal<br>OS=Zea mays<br>OX=4577<br>GN=ZEAMM<br>B73_Zm0000<br>1d037521<br>PE=2 SV=1 | ZEAMMB<br>73_Zm0000<br>01d037521 | LYESGK(1)<br>MTPGR          |      |       |  |  |  |  |      |       | 0.801 |       |  |  |  | chloroplast | K00232 | E1.3.3.6, ACOX1, ACOX3; acyl-CoA oxidase [EC:1.3.3.6]<br>map00071 Fatty acid degradation; map00410 beta-Alanine metabolism; map00592 alpha-Linolenic acid metabolism; map00640 Propanoate metabolism; map01040 Biosynthesis of unsaturated fatty acids; map01100 Metabolic pathways; map01110 Biosynthesis of secondary metabolites; map01200 Carbon metabolism; map01212 Fatty acid metabolism; map04146 Peroxisome |
| B4G0E0 | 430 | Acyl-coenzyme A oxidase 4 peroxisomal<br>OS=Zea mays<br>OX=4577<br>GN=ZEAMM<br>B73_Zm0000<br>1d037521<br>PE=2 SV=1 | ZEAMMB<br>73_Zm0000<br>01d037521 | PAVSAK(1)<br>SR             |      |       |  |  |  |  |      |       | 0.801 |       |  |  |  | chloroplast | K00232 | E1.3.3.6, ACOX1, ACOX3; acyl-CoA oxidase [EC:1.3.3.6]<br>map00071 Fatty acid degradation; map00410 beta-Alanine metabolism; map00592 alpha-Linolenic acid metabolism; map00640 Propanoate metabolism; map01040 Biosynthesis of unsaturated fatty acids; map01100 Metabolic pathways; map01110 Biosynthesis of secondary metabolites; map01200 Carbon metabolism; map01212 Fatty acid metabolism; map04146 Peroxisome |

|            |          |                                                                                              |                        |                        |  |  |  |  |  |  |           |           |           |           |       |       |           |            |             |                                                             |                                                                                                                                                                                                                                                                                                                                                                                                                                                                                                                                          |                                                                                                                                                                                                                                                                                                                                                             |
|------------|----------|----------------------------------------------------------------------------------------------|------------------------|------------------------|--|--|--|--|--|--|-----------|-----------|-----------|-----------|-------|-------|-----------|------------|-------------|-------------------------------------------------------------|------------------------------------------------------------------------------------------------------------------------------------------------------------------------------------------------------------------------------------------------------------------------------------------------------------------------------------------------------------------------------------------------------------------------------------------------------------------------------------------------------------------------------------------|-------------------------------------------------------------------------------------------------------------------------------------------------------------------------------------------------------------------------------------------------------------------------------------------------------------------------------------------------------------|
| A0A1D6F4B6 | 155      | Putative acyl-CoA dehydrogenase 1BR3 OS=Zea mays OX=4577 GN=100502333 PE=4 SV=1              | 100502333              | AIYLSTAK(1)TLAAIHK     |  |  |  |  |  |  | 0.747     | 0.896     |           |           |       |       |           | cytoplasm  | K00249      | ACADM, acyl-CoA dehydrogenase [EC:1.3.8.7]                  | map00071 Fatty acid degradation; map00280 Valine, leucine and isoleucine degradation; map01100 Metabolic pathways; map01110 Biosynthesis of secondary metabolites; map01212 Fatty acid metabolism                                                                                                                                                                                                                                                                                                                                        |                                                                                                                                                                                                                                                                                                                                                             |
| A0A1D6F4B6 | 826      | Putative acyl-CoA dehydrogenase 1BR3 OS=Zea mays OX=4577 GN=100502333 PE=4 SV=1              | 100502333              | IADGPDEVHLGTIAK(1)LELR |  |  |  |  |  |  | 0.84      |           |           |           |       |       |           | cytoplasm  | K00249      | ACADM, acyl-CoA dehydrogenase [EC:1.3.8.7]                  | map00071 Fatty acid degradation; map00280 Valine, leucine and isoleucine degradation; map01100 Metabolic pathways; map01110 Biosynthesis of secondary metabolites; map01212 Fatty acid metabolism                                                                                                                                                                                                                                                                                                                                        |                                                                                                                                                                                                                                                                                                                                                             |
| A0A1D6F4B6 | 172      | Putative acyl-CoA dehydrogenase 1BR3 OS=Zea mays OX=4577 GN=100502333 PE=4 SV=1              | 100502333              | VDINAIGLQK(1)YGR       |  |  |  |  |  |  | 0.987     | 1.015     | 0.878     | 0.434     |       |       | 0.452     | cytoplasm  | K00249      | ACADM, acyl-CoA dehydrogenase [EC:1.3.8.7]                  | map00071 Fatty acid degradation; map00280 Valine, leucine and isoleucine degradation; map01100 Metabolic pathways; map01110 Biosynthesis of secondary metabolites; map01212 Fatty acid metabolism                                                                                                                                                                                                                                                                                                                                        |                                                                                                                                                                                                                                                                                                                                                             |
| A0A1D6K4Z6 | 218      | Putative acetyl-CoA acetyltransferase cytosolic 2 OS=Zea mays OX=4577 GN=100282283 PE=3 SV=1 | 100282283              | K(1)LRPSFK             |  |  |  |  |  |  |           |           |           |           |       |       |           | cytoplasm  | K00626      | E2.3.1.9, atoB; acetyl-CoA C-acetyltransferase [EC:2.3.1.9] | map00071 Fatty acid degradation; map00072 Synthesis and degradation of ketone bodies; map00280 Valine, leucine and isoleucine degradation; map00310 Lysine degradation; map00380 Tryptophan metabolism; map00620 Pyruvate metabolism; map00630 Glyoxylate and dicarboxylate metabolism; map00640 Propanoate metabolism; map00650 Butanoate metabolism; map00900 Terpenoid backbone biosynthesis; map01100 Metabolic pathways; map01110 Biosynthesis of secondary metabolites; map01200 Carbon metabolism; map01212 Fatty acid metabolism |                                                                                                                                                                                                                                                                                                                                                             |
| A0A1D6N7A4 | 346.1923 | Acyl-coenzyme A oxidase OS=Zea mays OX=4577 GN=ZEAMMB73_Zm0001d042884 PE=3 SV=1              | ZEAMMB73_Zm0001d042884 | ALYAEFLGAQK(2)K        |  |  |  |  |  |  | 0.9697801 | 0.8580984 | 0.8116136 | 0.4554742 | 1.146 | 0.182 | 0.4065464 | -0.1080711 | chloroplast | K00232                                                      | E1.3.3.6, ACOX1, ACOX3; acyl-CoA oxidase [EC:1.3.3.6]                                                                                                                                                                                                                                                                                                                                                                                                                                                                                    | map00071 Fatty acid degradation; map00410 beta-Alanine metabolism; map00592 alpha-Linolenic acid metabolism; map00640 Propanoate metabolism; map01040 Biosynthesis of unsaturated fatty acids; map01100 Metabolic pathways; map01110 Biosynthesis of secondary metabolites; map01200 Carbon metabolism; map01212 Fatty acid metabolism; map04146 Peroxisome |

|            |          |                                                                                              |                         |                          |  |       |       |       |  |  |           |           |           |           |       |  |           |  |             |        |                                                                                                                                                                                                                                                                                                                                                                                                                      |
|------------|----------|----------------------------------------------------------------------------------------------|-------------------------|--------------------------|--|-------|-------|-------|--|--|-----------|-----------|-----------|-----------|-------|--|-----------|--|-------------|--------|----------------------------------------------------------------------------------------------------------------------------------------------------------------------------------------------------------------------------------------------------------------------------------------------------------------------------------------------------------------------------------------------------------------------|
| A0A1D6N7A4 | 338.3297 | Acyl-coenzyme A oxidase<br>OS=Zea mays<br>OX=4577<br>GN=ZEAMMB73_Zm00001d042884<br>PE=3 SV=1 | ZEAMMB73_Zm00001d042884 | HHDK(2)WLVATE<br>NYDIK   |  |       |       |       |  |  | 0.9881776 | 0.8578443 | 0.8010909 | 0.4671753 | 1.236 |  | 0.4044845 |  | chloroplast | K00232 | E1.3.3.6, ACOX1, ACOX3; acyl-CoA oxidase [EC:1.3.3.6]<br>map00071 Fatty acid degradation; map00410 beta-Alanine metabolism; map00592 alpha-Linolenic acid metabolism; map00640 Propanoate metabolism; map01040 Biosynthesis of unsaturated fatty acids; map01100 Metabolic pathways; map01110 Biosynthesis of secondary metabolites; map01200 Carbon metabolism; map01212 Fatty acid metabolism; map04146 Peroxisome |
| B4F8X3     | 330.467  | Acyl-coenzyme A oxidase<br>OS=Zea mays<br>OX=4577<br>GN=100191469<br>PE=2 SV=1               | 100191469               | ILMK(2)T<br>LSQLTSG<br>K |  | 0.902 | 1.354 | 0.648 |  |  |           |           |           |           |       |  |           |  | chloroplast | K00232 | E1.3.3.6, ACOX1, ACOX3; acyl-CoA oxidase [EC:1.3.3.6]<br>map00071 Fatty acid degradation; map00410 beta-Alanine metabolism; map00592 alpha-Linolenic acid metabolism; map00640 Propanoate metabolism; map01040 Biosynthesis of unsaturated fatty acids; map01100 Metabolic pathways; map01110 Biosynthesis of secondary metabolites; map01200 Carbon metabolism; map01212 Fatty acid metabolism; map04146 Peroxisome |
| B4F8X3     | 322.6044 | Acyl-coenzyme A oxidase<br>OS=Zea mays<br>OX=4577<br>GN=100191469<br>PE=2 SV=1               | 100191469               | K(2)QFGS<br>QDGGPE<br>TK |  |       |       |       |  |  |           |           |           |           |       |  |           |  | chloroplast | K00232 | E1.3.3.6, ACOX1, ACOX3; acyl-CoA oxidase [EC:1.3.3.6]<br>map00071 Fatty acid degradation; map00410 beta-Alanine metabolism; map00592 alpha-Linolenic acid metabolism; map00640 Propanoate metabolism; map01040 Biosynthesis of unsaturated fatty acids; map01100 Metabolic pathways; map01110 Biosynthesis of secondary metabolites; map01200 Carbon metabolism; map01212 Fatty acid metabolism; map04146 Peroxisome |
| B4F8X3     | 314.7418 | Acyl-coenzyme A oxidase<br>OS=Zea mays<br>OX=4577<br>GN=100191469<br>PE=2 SV=1               | 100191469               | PLLK(2)Q<br>QLK          |  |       |       |       |  |  |           |           |           |           |       |  |           |  | chloroplast | K00232 | E1.3.3.6, ACOX1, ACOX3; acyl-CoA oxidase [EC:1.3.3.6]<br>map00071 Fatty acid degradation; map00410 beta-Alanine metabolism; map00592 alpha-Linolenic acid metabolism; map00640 Propanoate metabolism; map01040 Biosynthesis of unsaturated fatty acids; map01100 Metabolic pathways; map01110 Biosynthesis of secondary metabolites; map01200 Carbon metabolism; map01212 Fatty acid metabolism; map04146 Peroxisome |
| B4F8X3     | 306.8791 | Acyl-coenzyme A oxidase<br>OS=Zea mays<br>OX=4577<br>GN=100191469<br>PE=2 SV=1               | 100191469               | QQLK(2)L<br>SR           |  | 0.754 |       | 0.332 |  |  |           |           |           |           |       |  |           |  | chloroplast | K00232 | E1.3.3.6, ACOX1, ACOX3; acyl-CoA oxidase [EC:1.3.3.6]<br>map00071 Fatty acid degradation; map00410 beta-Alanine metabolism; map00592 alpha-Linolenic acid metabolism; map00640 Propanoate metabolism; map01040 Biosynthesis of unsaturated fatty acids; map01100 Metabolic pathways; map01110 Biosynthesis of secondary metabolites; map01200 Carbon metabolism; map01212 Fatty acid metabolism; map04146 Peroxisome |

|            |          |                                                                                                |                         |                        |  |  |  |  |  |  |           |           |           |           |  |  |  |           |             |        |                                                       |                                                                                                                                                                                                                                                                                                                                                             |
|------------|----------|------------------------------------------------------------------------------------------------|-------------------------|------------------------|--|--|--|--|--|--|-----------|-----------|-----------|-----------|--|--|--|-----------|-------------|--------|-------------------------------------------------------|-------------------------------------------------------------------------------------------------------------------------------------------------------------------------------------------------------------------------------------------------------------------------------------------------------------------------------------------------------------|
| B4G0E0     | 299.0165 | Acyl-coenzyme A oxidase 4 peroxisomal OS=Zea mays OX=4577 GN=ZEAMMB73_Zm00001d037521 PE=2 SV=1 | ZEAMMB73_Zm00001d037521 | K(2)QFGA PLAAFQL NQEK  |  |  |  |  |  |  | 1.0801649 | 0.8565738 | 0.7484773 | 0.5256804 |  |  |  | 0.3941753 | chloroplast | K00232 | E1.3.3.6, ACOX1, ACOX3; acyl-CoA oxidase [EC:1.3.3.6] | map00071 Fatty acid degradation; map00410 beta-Alanine metabolism; map00592 alpha-Linolenic acid metabolism; map00640 Propanoate metabolism; map01040 Biosynthesis of unsaturated fatty acids; map01100 Metabolic pathways; map01110 Biosynthesis of secondary metabolites; map01200 Carbon metabolism; map01212 Fatty acid metabolism; map04146 Peroxisome |
| B4G0E0     | 291.1538 | Acyl-coenzyme A oxidase 4 peroxisomal OS=Zea mays OX=4577 GN=ZEAMMB73_Zm00001d037521 PE=2 SV=1 | ZEAMMB73_Zm00001d037521 | LYESGK(2)MTPGR         |  |  |  |  |  |  | 1.0985624 | 0.8563197 | 0.7379545 | 0.5373814 |  |  |  | 0.3921134 | chloroplast | K00232 | E1.3.3.6, ACOX1, ACOX3; acyl-CoA oxidase [EC:1.3.3.6] | map00071 Fatty acid degradation; map00410 beta-Alanine metabolism; map00592 alpha-Linolenic acid metabolism; map00640 Propanoate metabolism; map01040 Biosynthesis of unsaturated fatty acids; map01100 Metabolic pathways; map01110 Biosynthesis of secondary metabolites; map01200 Carbon metabolism; map01212 Fatty acid metabolism; map04146 Peroxisome |
| B4G0E0     | 283.2912 | Acyl-coenzyme A oxidase 4 peroxisomal OS=Zea mays OX=4577 GN=ZEAMMB73_Zm00001d037521 PE=2 SV=1 | ZEAMMB73_Zm00001d037521 | PAVSAK(2)SR            |  |  |  |  |  |  | 1.1169598 | 0.8560656 | 0.7274318 | 0.5490825 |  |  |  | 0.3900515 | chloroplast | K00232 | E1.3.3.6, ACOX1, ACOX3; acyl-CoA oxidase [EC:1.3.3.6] | map00071 Fatty acid degradation; map00410 beta-Alanine metabolism; map00592 alpha-Linolenic acid metabolism; map00640 Propanoate metabolism; map01040 Biosynthesis of unsaturated fatty acids; map01100 Metabolic pathways; map01110 Biosynthesis of secondary metabolites; map01200 Carbon metabolism; map01212 Fatty acid metabolism; map04146 Peroxisome |
| A0A1D6F4B6 | 275.4286 | Putative acyl-CoA dehydrogenase 1BR3 OS=Zea mays OX=4577 GN=100502333 PE=4 SV=1                | 100502333               | AIYLSTAK(2)TLAAIHK     |  |  |  |  |  |  | 1.1353573 | 0.8558115 | 0.7169091 | 0.5607835 |  |  |  | 0.3879897 | cytoplasm   | K00249 | ACADM, acyl-CoA dehydrogenase [EC:1.3.8.7]            | map00071 Fatty acid degradation; map00280 Valine, leucine and isoleucine degradation; map01100 Metabolic pathways; map01110 Biosynthesis of secondary metabolites; map01212 Fatty acid metabolism                                                                                                                                                           |
| A0A1D6F4B6 | 267.5659 | Putative acyl-CoA dehydrogenase 1BR3 OS=Zea mays OX=4577 GN=100502333 PE=4 SV=1                | 100502333               | IADGPDEVHLGTIAK(2)LELR |  |  |  |  |  |  | 1.1537548 | 0.8555574 | 0.7063864 | 0.5724845 |  |  |  | 0.3859278 | cytoplasm   | K00249 | ACADM, acyl-CoA dehydrogenase [EC:1.3.8.7]            | map00071 Fatty acid degradation; map00280 Valine, leucine and isoleucine degradation; map01100 Metabolic pathways; map01110 Biosynthesis of secondary metabolites; map01212 Fatty acid metabolism                                                                                                                                                           |

|            |          |                                                                                              |                        |                    |       |       |       |  |  |  |  |  |  |  |  |  |  |  |  |  |                                                              |                                                                                                                                                                                                                                                                                                                                                                                                                                                                                                                                          |
|------------|----------|----------------------------------------------------------------------------------------------|------------------------|--------------------|-------|-------|-------|--|--|--|--|--|--|--|--|--|--|--|--|--|--------------------------------------------------------------|------------------------------------------------------------------------------------------------------------------------------------------------------------------------------------------------------------------------------------------------------------------------------------------------------------------------------------------------------------------------------------------------------------------------------------------------------------------------------------------------------------------------------------------|
| A0A1D6F4B6 | 259.7033 | Putative acyl-CoA dehydrogenase 1BR3 OS=Zea mays OX=4577 GN=100502333 PE=4 SV=1              | 100502333              | VDINAIG LQK(2)YGR  |       |       |       |  |  |  |  |  |  |  |  |  |  |  |  |  | ACADM, acyl-CoA dehydrogenase [EC:1.3.8.7]                   | map00071 Fatty acid degradation; map00280 Valine, leucine and isoleucine degradation; map01100 Metabolic pathways; map01110 Biosynthesis of secondary metabolites; map01212 Fatty acid metabolism                                                                                                                                                                                                                                                                                                                                        |
| A0A1D6K4Z7 | 251.8407 | Putative acetyl-CoA acetyltransferase cytosolic 2 OS=Zea mays OX=4577 GN=100282283 PE=3 SV=2 | 100282283              | K(2)LRPSFK         |       |       |       |  |  |  |  |  |  |  |  |  |  |  |  |  | E2.3.1.9, atoB; acetyl-CoA C-acetyltransferase [EC:2.3.1.10] | map00071 Fatty acid degradation; map00072 Synthesis and degradation of ketone bodies; map00280 Valine, leucine and isoleucine degradation; map00310 Lysine degradation; map00380 Tryptophan metabolism; map00620 Pyruvate metabolism; map00630 Glyoxylate and dicarboxylate metabolism; map00640 Propanoate metabolism; map00650 Butanoate metabolism; map00900 Terpenoid backbone biosynthesis; map01100 Metabolic pathways; map01110 Biosynthesis of secondary metabolites; map01200 Carbon metabolism; map01213 Fatty acid metabolism |
| A0A1D6N7A4 | 243.978  | Acyl-coenzyme A oxidase OS=Zea mays OX=4577 GN=ZEAMMB73_Zm0001d042884 PE=3 SV=1              | ZEAMMB73_Zm0001d042884 | ALYAEFLGAQK(3)K    |       |       |       |  |  |  |  |  |  |  |  |  |  |  |  |  | E1.3.3.6, ACOX1, ACOX3; acyl-CoA oxidase [EC:1.3.3.6]        | map00071 Fatty acid degradation; map00410 beta-Alanine metabolism; map00592 alpha-Linolenic acid metabolism; map00640 Propanoate metabolism; map01040 Biosynthesis of unsaturated fatty acids; map01100 Metabolic pathways; map01110 Biosynthesis of secondary metabolites; map01200 Carbon metabolism; map01212 Fatty acid metabolism; map04146 Peroxisome                                                                                                                                                                              |
| A0A1D6N7A4 | 236.1154 | Acyl-coenzyme A oxidase OS=Zea mays OX=4577 GN=ZEAMMB73_Zm0001d042884 PE=3 SV=1              | ZEAMMB73_Zm0001d042884 | HHDK(3)WLVATENYDIK |       |       |       |  |  |  |  |  |  |  |  |  |  |  |  |  | E1.3.3.6, ACOX1, ACOX3; acyl-CoA oxidase [EC:1.3.3.6]        | map00071 Fatty acid degradation; map00410 beta-Alanine metabolism; map00592 alpha-Linolenic acid metabolism; map00640 Propanoate metabolism; map01040 Biosynthesis of unsaturated fatty acids; map01100 Metabolic pathways; map01110 Biosynthesis of secondary metabolites; map01200 Carbon metabolism; map01212 Fatty acid metabolism; map04146 Peroxisome                                                                                                                                                                              |
| B4F8X3     | 228.2527 | Acyl-coenzyme A oxidase OS=Zea mays OX=4577 GN=100191469 PE=2 SV=1                           | 100191469              | ILMK(3)T LSQLTSGK  | 0.606 | 1.354 | 0.016 |  |  |  |  |  |  |  |  |  |  |  |  |  | E1.3.3.6, ACOX1, ACOX3; acyl-CoA oxidase [EC:1.3.3.6]        | map00071 Fatty acid degradation; map00410 beta-Alanine metabolism; map00592 alpha-Linolenic acid metabolism; map00640 Propanoate metabolism; map01040 Biosynthesis of unsaturated fatty acids; map01100 Metabolic pathways; map01110 Biosynthesis of secondary metabolites; map01200 Carbon metabolism; map01212 Fatty acid metabolism; map04146 Peroxisome                                                                                                                                                                              |

|        |          |                                                                                                                    |                                 |                             |       |  |  |  |  |  |           |           |           |           |       |        |           |            |             |        |                                                                                                                                                                                                                                                                                                                                                                                                                      |
|--------|----------|--------------------------------------------------------------------------------------------------------------------|---------------------------------|-----------------------------|-------|--|--|--|--|--|-----------|-----------|-----------|-----------|-------|--------|-----------|------------|-------------|--------|----------------------------------------------------------------------------------------------------------------------------------------------------------------------------------------------------------------------------------------------------------------------------------------------------------------------------------------------------------------------------------------------------------------------|
| B4F8X3 | 220.3901 | Acyl-coenzyme A oxidase<br>OS=Zea mays<br>OX=4577<br>GN=1001914<br>69 PE=2<br>SV=1                                 | 100191469                       | K(3)QFGS<br>QDGGPE<br>TK    |       |  |  |  |  |  | 1.2457421 | 0.8542869 | 0.6537727 | 0.6309897 | 1.956 | -0.076 | 0.3756186 | -0.4338807 | chloroplast | K00232 | E1.3.3.6, ACOX1, ACOX3; acyl-CoA oxidase [EC:1.3.3.6]<br>map00071 Fatty acid degradation; map00410 beta-Alanine metabolism; map00592 alpha-Linolenic acid metabolism; map00640 Propanoate metabolism; map01040 Biosynthesis of unsaturated fatty acids; map01100 Metabolic pathways; map01110 Biosynthesis of secondary metabolites; map01200 Carbon metabolism; map01212 Fatty acid metabolism; map04146 Peroxisome |
| B4F8X3 | 212.5275 | Acyl-coenzyme A oxidase<br>OS=Zea mays<br>OX=4577<br>GN=1001914<br>69 PE=2<br>SV=1                                 | 100191469                       | PLLK(3)Q<br>QLK             |       |  |  |  |  |  | 1.2641395 | 0.8540328 | 0.64325   | 0.6426907 | 2.046 |        | 0.3735567 |            | chloroplast | K00232 | E1.3.3.6, ACOX1, ACOX3; acyl-CoA oxidase [EC:1.3.3.6]<br>map00071 Fatty acid degradation; map00410 beta-Alanine metabolism; map00592 alpha-Linolenic acid metabolism; map00640 Propanoate metabolism; map01040 Biosynthesis of unsaturated fatty acids; map01100 Metabolic pathways; map01110 Biosynthesis of secondary metabolites; map01200 Carbon metabolism; map01212 Fatty acid metabolism; map04146 Peroxisome |
| B4F8X3 | 204.6648 | Acyl-coenzyme A oxidase<br>OS=Zea mays<br>OX=4577<br>GN=1001914<br>69 PE=2<br>SV=1                                 | 100191469                       | QQLK(3)L<br>SR              | 0.458 |  |  |  |  |  | 1.282537  | 0.8537787 | 0.6327273 | 0.6543918 | 2.136 |        | 0.3714948 |            | chloroplast | K00232 | E1.3.3.6, ACOX1, ACOX3; acyl-CoA oxidase [EC:1.3.3.6]<br>map00071 Fatty acid degradation; map00410 beta-Alanine metabolism; map00592 alpha-Linolenic acid metabolism; map00640 Propanoate metabolism; map01040 Biosynthesis of unsaturated fatty acids; map01100 Metabolic pathways; map01110 Biosynthesis of secondary metabolites; map01200 Carbon metabolism; map01212 Fatty acid metabolism; map04146 Peroxisome |
| B4G0E0 | 196.8022 | Acyl-coenzyme A oxidase 4 peroxisomal<br>OS=Zea mays<br>OX=4577<br>GN=ZEAMM<br>B73_Zm0000<br>1d037521<br>PE=2 SV=1 | ZEAMMB<br>73_Zm000<br>01d037521 | K(3)QFGA<br>PLAAFQL<br>NQEK |       |  |  |  |  |  | 1.3009345 | 0.8535246 | 0.6222045 | 0.6660928 |       |        | 0.369433  |            | chloroplast | K00232 | E1.3.3.6, ACOX1, ACOX3; acyl-CoA oxidase [EC:1.3.3.6]<br>map00071 Fatty acid degradation; map00410 beta-Alanine metabolism; map00592 alpha-Linolenic acid metabolism; map00640 Propanoate metabolism; map01040 Biosynthesis of unsaturated fatty acids; map01100 Metabolic pathways; map01110 Biosynthesis of secondary metabolites; map01200 Carbon metabolism; map01212 Fatty acid metabolism; map04146 Peroxisome |
| B4G0E0 | 188.9396 | Acyl-coenzyme A oxidase 4 peroxisomal<br>OS=Zea mays<br>OX=4577<br>GN=ZEAMM<br>B73_Zm0000<br>1d037521<br>PE=2 SV=1 | ZEAMMB<br>73_Zm000<br>01d037521 | LYESGK(<br>3)MTPGR          |       |  |  |  |  |  | 1.3193319 | 0.8532705 | 0.6116818 | 0.6777938 |       |        | 0.3673711 |            | chloroplast | K00232 | E1.3.3.6, ACOX1, ACOX3; acyl-CoA oxidase [EC:1.3.3.6]<br>map00071 Fatty acid degradation; map00410 beta-Alanine metabolism; map00592 alpha-Linolenic acid metabolism; map00640 Propanoate metabolism; map01040 Biosynthesis of unsaturated fatty acids; map01100 Metabolic pathways; map01110 Biosynthesis of secondary metabolites; map01200 Carbon metabolism; map01212 Fatty acid metabolism; map04146 Peroxisome |

|            |          |                                                                                                |                         |                        |  |  |  |  |  |  |           |           |           |           |  |  |  |           |             |        |                                                              |                                                                                                                                                                                                                                                                                                                                                                                                                                                                                                                                          |
|------------|----------|------------------------------------------------------------------------------------------------|-------------------------|------------------------|--|--|--|--|--|--|-----------|-----------|-----------|-----------|--|--|--|-----------|-------------|--------|--------------------------------------------------------------|------------------------------------------------------------------------------------------------------------------------------------------------------------------------------------------------------------------------------------------------------------------------------------------------------------------------------------------------------------------------------------------------------------------------------------------------------------------------------------------------------------------------------------------|
| B4G0E0     | 181.0769 | Acyl-coenzyme A oxidase 4 peroxisomal OS=Zea mays OX=4577 GN=ZEAMMB73_Zm00001d037521 PE=2 SV=1 | ZEAMMB73_Zm00001d037521 | PAVSAK(3)SR            |  |  |  |  |  |  | 1.3377294 | 0.8530164 | 0.6011591 | 0.6894948 |  |  |  | 0.3653093 | chloroplast | K00232 | E1.3.3.6, ACOX1, ACOX3; acyl-CoA oxidase [EC:1.3.3.6]        | map00071 Fatty acid degradation; map00410 beta-Alanine metabolism; map00592 alpha-Linolenic acid metabolism; map00640 Propanoate metabolism; map01040 Biosynthesis of unsaturated fatty acids; map01100 Metabolic pathways; map01110 Biosynthesis of secondary metabolites; map01200 Carbon metabolism; map01212 Fatty acid metabolism; map04146 Peroxisome                                                                                                                                                                              |
| A0A1D6F4B6 | 173.2143 | Putative acyl-CoA dehydrogenase 1BR3 OS=Zea mays OX=4577 GN=100502333 PE=4 SV=1                | 100502333               | AIYLSTAK(3)TLAAIHK     |  |  |  |  |  |  | 1.3561268 | 0.8527623 | 0.5906364 | 0.7011959 |  |  |  | 0.3632474 | cytoplasm   | K00249 | ACADM, acyl-CoA dehydrogenase [EC:1.3.8.7]                   | map00071 Fatty acid degradation; map00280 Valine, leucine and isoleucine degradation; map01100 Metabolic pathways; map01110 Biosynthesis of secondary metabolites; map01212 Fatty acid metabolism                                                                                                                                                                                                                                                                                                                                        |
| A0A1D6F4B6 | 165.3516 | Putative acyl-CoA dehydrogenase 1BR3 OS=Zea mays OX=4577 GN=100502333 PE=4 SV=1                | 100502333               | IADGPDEVHLGTIAK(3)LELR |  |  |  |  |  |  | 1.3745243 | 0.8525082 | 0.5801136 | 0.7128969 |  |  |  | 0.3611856 | cytoplasm   | K00249 | ACADM, acyl-CoA dehydrogenase [EC:1.3.8.7]                   | map00071 Fatty acid degradation; map00280 Valine, leucine and isoleucine degradation; map01100 Metabolic pathways; map01110 Biosynthesis of secondary metabolites; map01212 Fatty acid metabolism                                                                                                                                                                                                                                                                                                                                        |
| A0A1D6F4B6 | 157.489  | Putative acyl-CoA dehydrogenase 1BR3 OS=Zea mays OX=4577 GN=100502333 PE=4 SV=1                | 100502333               | VDINAIGLQK(3)YGR       |  |  |  |  |  |  | 1.3929218 | 0.8522541 | 0.5695909 | 0.7245979 |  |  |  | 0.3591237 | cytoplasm   | K00249 | ACADM, acyl-CoA dehydrogenase [EC:1.3.8.7]                   | map00071 Fatty acid degradation; map00280 Valine, leucine and isoleucine degradation; map01100 Metabolic pathways; map01110 Biosynthesis of secondary metabolites; map01212 Fatty acid metabolism                                                                                                                                                                                                                                                                                                                                        |
| A0A1D6K4Z8 | 149.6264 | Putative acetyl-CoA acetyltransferase cytosolic 2 OS=Zea mays OX=4577 GN=100282283 PE=3 SV=3   | 100282283               | K(3)LRPSFK             |  |  |  |  |  |  |           |           |           |           |  |  |  |           | cytoplasm   | K00626 | E2.3.1.9, atoB; acetyl-CoA C-acetyltransferase [EC:2.3.1.11] | map00071 Fatty acid degradation; map00072 Synthesis and degradation of ketone bodies; map00280 Valine, leucine and isoleucine degradation; map00310 Lysine degradation; map00380 Tryptophan metabolism; map00620 Pyruvate metabolism; map00630 Glyoxylate and dicarboxylate metabolism; map00640 Propanoate metabolism; map00650 Butanoate metabolism; map00900 Terpenoid backbone biosynthesis; map01100 Metabolic pathways; map01110 Biosynthesis of secondary metabolites; map01200 Carbon metabolism; map01214 Fatty acid metabolism |

|            |          |                                                                                              |                         |                    |      |       |        |  |  |  |           |           |           |           |       |        |           |            |             |        |                                                                                                                                                                                                                                                                                                                                                                                                                      |
|------------|----------|----------------------------------------------------------------------------------------------|-------------------------|--------------------|------|-------|--------|--|--|--|-----------|-----------|-----------|-----------|-------|--------|-----------|------------|-------------|--------|----------------------------------------------------------------------------------------------------------------------------------------------------------------------------------------------------------------------------------------------------------------------------------------------------------------------------------------------------------------------------------------------------------------------|
| A0A1D6N7A4 | 141.7637 | Acyl-coenzyme A oxidase<br>OS=Zea mays<br>OX=4577<br>GN=ZEAMMB73_Zm00001d042884<br>PE=3 SV=1 | ZEAMMB73_Zm00001d042884 | ALYAEFLGAQK(4)     |      |       |        |  |  |  | 1.4113192 | 0.852     | 0.5590682 | 0.736299  | 2.226 | -0.162 | 0.3570619 | -0.5424838 | chloroplast | K00232 | E1.3.3.6, ACOX1, ACOX3; acyl-CoA oxidase [EC:1.3.3.6]<br>map00071 Fatty acid degradation; map00410 beta-Alanine metabolism; map00592 alpha-Linolenic acid metabolism; map00640 Propanoate metabolism; map01040 Biosynthesis of unsaturated fatty acids; map01100 Metabolic pathways; map01110 Biosynthesis of secondary metabolites; map01200 Carbon metabolism; map01212 Fatty acid metabolism; map04146 Peroxisome |
| A0A1D6N7A4 | 133.9011 | Acyl-coenzyme A oxidase<br>OS=Zea mays<br>OX=4577<br>GN=ZEAMMB73_Zm00001d042884<br>PE=3 SV=1 | ZEAMMB73_Zm00001d042884 | HHDK(4)WLVATENYDIK |      |       |        |  |  |  | 1.4297167 | 0.8517459 | 0.5485455 | 0.748     | 2.316 |        | 0.355     |            | chloroplast | K00232 | E1.3.3.6, ACOX1, ACOX3; acyl-CoA oxidase [EC:1.3.3.6]<br>map00071 Fatty acid degradation; map00410 beta-Alanine metabolism; map00592 alpha-Linolenic acid metabolism; map00640 Propanoate metabolism; map01040 Biosynthesis of unsaturated fatty acids; map01100 Metabolic pathways; map01110 Biosynthesis of secondary metabolites; map01200 Carbon metabolism; map01212 Fatty acid metabolism; map04146 Peroxisome |
| B4F8X3     | 126.0385 | Acyl-coenzyme A oxidase<br>OS=Zea mays<br>OX=4577<br>GN=100191469<br>PE=2<br>SV=1            | 100191469               | ILMK(4)TLSQLTSG    | 0.31 | 1.354 | -0.616 |  |  |  | 1.4481142 | 0.8514918 | 0.5380227 | 0.759701  | 2.406 |        | 0.3529381 |            | chloroplast | K00232 | E1.3.3.6, ACOX1, ACOX3; acyl-CoA oxidase [EC:1.3.3.6]<br>map00071 Fatty acid degradation; map00410 beta-Alanine metabolism; map00592 alpha-Linolenic acid metabolism; map00640 Propanoate metabolism; map01040 Biosynthesis of unsaturated fatty acids; map01100 Metabolic pathways; map01110 Biosynthesis of secondary metabolites; map01200 Carbon metabolism; map01212 Fatty acid metabolism; map04146 Peroxisome |
| B4F8X3     | 118.1758 | Acyl-coenzyme A oxidase<br>OS=Zea mays<br>OX=4577<br>GN=100191469<br>PE=2<br>SV=1            | 100191469               | K(4)QFGSQDGGPE     |      |       |        |  |  |  | 1.4665116 | 0.8512377 | 0.5275    | 0.7714021 | 2.496 | -0.248 | 0.3508763 | -0.651087  | chloroplast | K00232 | E1.3.3.6, ACOX1, ACOX3; acyl-CoA oxidase [EC:1.3.3.6]<br>map00071 Fatty acid degradation; map00410 beta-Alanine metabolism; map00592 alpha-Linolenic acid metabolism; map00640 Propanoate metabolism; map01040 Biosynthesis of unsaturated fatty acids; map01100 Metabolic pathways; map01110 Biosynthesis of secondary metabolites; map01200 Carbon metabolism; map01212 Fatty acid metabolism; map04146 Peroxisome |
| B4F8X3     | 110.3132 | Acyl-coenzyme A oxidase<br>OS=Zea mays<br>OX=4577<br>GN=100191469<br>PE=2<br>SV=1            | 100191469               | PLLK(4)QQLK        |      |       |        |  |  |  | 1.4849091 | 0.8509836 | 0.5169773 | 0.7831031 | 2.586 |        | 0.3488144 |            | chloroplast | K00232 | E1.3.3.6, ACOX1, ACOX3; acyl-CoA oxidase [EC:1.3.3.6]<br>map00071 Fatty acid degradation; map00410 beta-Alanine metabolism; map00592 alpha-Linolenic acid metabolism; map00640 Propanoate metabolism; map01040 Biosynthesis of unsaturated fatty acids; map01100 Metabolic pathways; map01110 Biosynthesis of secondary metabolites; map01200 Carbon metabolism; map01212 Fatty acid metabolism; map04146 Peroxisome |



|            |          |                                                                                                                    |                                  |                             |       |        |  |  |  |           |           |           |           |       |           |             |             |                                                                                                                                                                                                                                                                                                                                                                                                                      |                                                                                                                                                                                                                                                                                                                                                                                                                      |
|------------|----------|--------------------------------------------------------------------------------------------------------------------|----------------------------------|-----------------------------|-------|--------|--|--|--|-----------|-----------|-----------|-----------|-------|-----------|-------------|-------------|----------------------------------------------------------------------------------------------------------------------------------------------------------------------------------------------------------------------------------------------------------------------------------------------------------------------------------------------------------------------------------------------------------------------|----------------------------------------------------------------------------------------------------------------------------------------------------------------------------------------------------------------------------------------------------------------------------------------------------------------------------------------------------------------------------------------------------------------------|
| B4F8X3     | 102.4505 | Acyl-coenzyme A oxidase<br>OS=Zea mays<br>OX=4577<br>GN=1001914<br>69 PE=2<br>SV=1                                 | 100191469                        | QQLK(4)LSR                  | 0.162 | -0.932 |  |  |  | 1.5033066 | 0.8507295 | 0.5064545 | 0.7948041 | 2.676 |           | 0.3467526   | chloroplast | K00232                                                                                                                                                                                                                                                                                                                                                                                                               | E1.3.3.6, ACOX1, ACOX3; acyl-CoA oxidase [EC:1.3.3.6]<br>map00071 Fatty acid degradation; map00410 beta-Alanine metabolism; map00592 alpha-Linolenic acid metabolism; map00640 Propanoate metabolism; map01040 Biosynthesis of unsaturated fatty acids; map01100 Metabolic pathways; map01110 Biosynthesis of secondary metabolites; map01200 Carbon metabolism; map01212 Fatty acid metabolism; map04146 Peroxisome |
| B4G0E0     | 94.58791 | Acyl-coenzyme A oxidase 4 peroxisomal<br>OS=Zea mays<br>OX=4577<br>GN=ZEAMM<br>B73_Zm0000<br>1d037521<br>PE=2 SV=1 | ZEAMMB<br>73_Zm0000<br>01d037521 | K(4)QFGA<br>PLAAFQL<br>NQEK |       |        |  |  |  | 1.521704  | 0.8504754 | 0.4959318 | 0.8065052 |       | 0.3446907 | chloroplast | K00232      | E1.3.3.6, ACOX1, ACOX3; acyl-CoA oxidase [EC:1.3.3.6]<br>map00071 Fatty acid degradation; map00410 beta-Alanine metabolism; map00592 alpha-Linolenic acid metabolism; map00640 Propanoate metabolism; map01040 Biosynthesis of unsaturated fatty acids; map01100 Metabolic pathways; map01110 Biosynthesis of secondary metabolites; map01200 Carbon metabolism; map01212 Fatty acid metabolism; map04146 Peroxisome |                                                                                                                                                                                                                                                                                                                                                                                                                      |
| B4G0E0     | 86.72527 | Acyl-coenzyme A oxidase 4 peroxisomal<br>OS=Zea mays<br>OX=4577<br>GN=ZEAMM<br>B73_Zm0000<br>1d037521<br>PE=2 SV=1 | ZEAMMB<br>73_Zm0000<br>01d037521 | LYESGK(4)MTPGR              |       |        |  |  |  | 1.5401015 | 0.8502213 | 0.4854091 | 0.8182062 |       | 0.3426289 | chloroplast | K00232      | E1.3.3.6, ACOX1, ACOX3; acyl-CoA oxidase [EC:1.3.3.6]<br>map00071 Fatty acid degradation; map00410 beta-Alanine metabolism; map00592 alpha-Linolenic acid metabolism; map00640 Propanoate metabolism; map01040 Biosynthesis of unsaturated fatty acids; map01100 Metabolic pathways; map01110 Biosynthesis of secondary metabolites; map01200 Carbon metabolism; map01212 Fatty acid metabolism; map04146 Peroxisome |                                                                                                                                                                                                                                                                                                                                                                                                                      |
| B4G0E0     | 78.86264 | Acyl-coenzyme A oxidase 4 peroxisomal<br>OS=Zea mays<br>OX=4577<br>GN=ZEAMM<br>B73_Zm0000<br>1d037521<br>PE=2 SV=1 | ZEAMMB<br>73_Zm0000<br>01d037521 | PAVSAK(4)SR                 |       |        |  |  |  | 1.5584989 | 0.8499672 | 0.4748864 | 0.8299072 |       | 0.340567  | chloroplast | K00232      | E1.3.3.6, ACOX1, ACOX3; acyl-CoA oxidase [EC:1.3.3.6]<br>map00071 Fatty acid degradation; map00410 beta-Alanine metabolism; map00592 alpha-Linolenic acid metabolism; map00640 Propanoate metabolism; map01040 Biosynthesis of unsaturated fatty acids; map01100 Metabolic pathways; map01110 Biosynthesis of secondary metabolites; map01200 Carbon metabolism; map01212 Fatty acid metabolism; map04146 Peroxisome |                                                                                                                                                                                                                                                                                                                                                                                                                      |
| A0A1D6F4B6 | 71       | Putative acyl-CoA dehydrogenase 1BR3<br>OS=Zea mays<br>OX=4577<br>GN=1005023<br>33 PE=4<br>SV=1                    | 100502333                        | AIYLSTAK(4)TLAAIHK          |       |        |  |  |  | 1.5768964 | 0.8497131 | 0.4643636 | 0.8416082 |       | 0.3385052 | cytoplasm   | K00249      | ACADM, acyl-CoA dehydrogenase [EC:1.3.8.7]<br>map00071 Fatty acid degradation; map00280 Valine, leucine and isoleucine degradation; map01100 Metabolic pathways; map01110 Biosynthesis of secondary metabolites; map01212 Fatty acid metabolism                                                                                                                                                                      |                                                                                                                                                                                                                                                                                                                                                                                                                      |

|            |          |                                                                                                |           |                                |  |  |  |  |  |  |           |           |           |           |  |  |  |  |  |           |        |                                            |                                                                                                                                                                                                   |
|------------|----------|------------------------------------------------------------------------------------------------|-----------|--------------------------------|--|--|--|--|--|--|-----------|-----------|-----------|-----------|--|--|--|--|--|-----------|--------|--------------------------------------------|---------------------------------------------------------------------------------------------------------------------------------------------------------------------------------------------------|
| A0A1D6F4B6 | 63.13736 | Putative acyl-CoA dehydrogenase IBR3<br>OS=Zea mays<br>OX=4577<br>GN=100502333<br>PE=4<br>SV=1 | 100502333 | IADGPDE<br>VHLGTIA<br>K(4)LELR |  |  |  |  |  |  | 1.5952939 | 0.849459  | 0.4538409 | 0.8533093 |  |  |  |  |  | cytoplasm | K00249 | ACADM, acyl-CoA dehydrogenase [EC:1.3.8.7] | map00071 Fatty acid degradation; map00280 Valine, leucine and isoleucine degradation; map01100 Metabolic pathways; map01110 Biosynthesis of secondary metabolites; map01212 Fatty acid metabolism |
| A0A1D6F4B6 | 55.27473 | Putative acyl-CoA dehydrogenase IBR3<br>OS=Zea mays<br>OX=4577<br>GN=100502333<br>PE=4<br>SV=1 | 100502333 | VDINAIG<br>LQK(4)Y<br>GR       |  |  |  |  |  |  | 1.6136913 | 0.8492049 | 0.4433182 | 0.8650103 |  |  |  |  |  | cytoplasm | K00249 | ACADM, acyl-CoA dehydrogenase [EC:1.3.8.7] | map00071 Fatty acid degradation; map00280 Valine, leucine and isoleucine degradation; map01100 Metabolic pathways; map01110 Biosynthesis of secondary metabolites; map01212 Fatty acid metabolism |

**Table S3.** Primers used in the study.

Chip-qPCR

|                      |                           |
|----------------------|---------------------------|
| Zm00001eb096400-P1_F | GTACATGCCGTCGTGGCAG       |
| Zm00001eb096400-P1_R | GACGGCCACGACATCTCAT       |
| Zm00001eb096400-P2_F | TCGTCTGAAGGTCATTATATCCGAG |
| Zm00001eb096400-P2_R | AAAGGCCTACGTCCTTCGAAG     |
| Zm00001eb125070-P1_F | TTTTTTTGTCCGGCTTTGTTGG    |
| Zm00001eb125070-P1_R | AGTCAGCCACCTGCAGAACAC     |

qPCR

|                   |                        |
|-------------------|------------------------|
| Zm00001eb096400_F | TGGTGCCCATGACGTACAT    |
| Zm00001eb096400_R | GATCTTGATGGATTTGAACTGC |
| Zm00001eb125070_F | TGAGATGACCGAGATGGACA   |
| Zm00001eb125070_R | TCCAGCTCCTTCATATTTGC   |
